# Supplementary material for: Colombian Essential Oil of Ruta graveolens against Nosocomial Antifungal Resistant Candida Strains
Source: MDPI journal article supplement (doi:10.3390/jof7050383), 2021-05-14
Supplement: s1 [file s1]

# Colombian essential oil of *Ruta graveolens* against *Candida* sp. isolated from the oral cavity of patients with head and neck cancer

Matthew Gavino Donadu<sup>1,4†</sup>, Yeimmy Peralta-Ruiz<sup>2,3†</sup>, Donatella Usai<sup>4</sup>, Francesca Maggio<sup>\*2</sup>, Junior Bernardo Molina-Hernandez<sup>2</sup>, Davide Rizzo<sup>5</sup>, Francesco Bussu<sup>5</sup>, Salvatore Rubino<sup>4</sup>, Stefania Zanetti<sup>4</sup>, Antonello Paparella<sup>2</sup>, Clemencia Chaves Lopez<sup>\*2</sup>

**Table S1.** Main volatile compounds identified in *Ruta graveolens* essential oil.

| Compound                              | %    | Functional groups             | %    |
|---------------------------------------|------|-------------------------------|------|
| 2- undecanone                         | 42.6 | Ketones                       | 78.7 |
| 2-nonanone                            | 23.5 | Sesquiterpenes                | 5.6  |
| 2-decanone                            | 4.0  | Alcohols                      | 4.2  |
| 2-nonanol                             | 3.0  | Esters                        | 4.8  |
| 2-dodecanone                          | 2.9  | Sesquiterpenoids              | 1.3  |
| Isodecanone                           | 2.6  | Furanocoumarins               | 1.4  |
| 2-tridecanone                         | 2.5  | Monoterpene ketones           | 0.3  |
| Benzyl acetate                        | 1.7  | Total unidentified components | 3.7  |
| 1-Methylheptyl acetate                | 1.3  |                               |      |
| 2-Undecanol                           | 1.1  |                               |      |
| Humulene                              | 1.1  |                               |      |
| (-)-Aromadendrene                     | 0.9  |                               |      |
| <i>trans</i> - $\beta$ -Caryophyllene | 0.8  |                               |      |
| Viridiflorol                          | 0.8  |                               |      |
| Nonyl acetate                         | 0.7  |                               |      |
| Benzyl 2-hydroxybenzoate              | 0.5  |                               |      |
| $\sigma$ -cadinene                    | 0.5  |                               |      |
